# Supplementary material
Source: PubMed Central journal article supplement (PMC6837414)
Supplement: YRER_A_1215120_SM2924.pdf [file YRER_A_1215120_SM2924.pdf]

1 Supporting Information for

2  
3 **Submitted to Redox Report**

4 **“Research Article” type**

5  
6 **Modification of cysteine 457 in plakoglobin modulates the proliferation and migration**  
7 **of colorectal cancer cells by altering binding to E-cadherin/catenins**

8  
9 **Suhee Kim<sup>1,2</sup>, Sun Hee Ahn<sup>1</sup>, Hee-Young Yang<sup>1</sup>, Jin-Sil Lee<sup>1</sup>, Hyang-Gi Choi<sup>1,2</sup>, Young-**  
10 **Kyu Park<sup>3</sup>, Tae-Hoon Lee<sup>1, 2</sup>**

11  
12 <sup>1</sup>Department of Oral Biochemistry, Dental Science Research Institute, Medical Research Center for  
13 Biomineralization Disorders, School of Dentistry, Chonnam National University, Gwangju, Republic of Korea

14 <sup>2</sup>Department of Molecular Medicine (BK21plus), Chonnam National University Graduate School, Gwangju,  
15 Republic of Korea

16 <sup>3</sup>Department of Surgery, Chonnam National University Hwasun Hospital, Hwasun, Korea  
17

18  
19 Correspondence to: Tae-Hoon Lee, Department of Oral Biochemistry, School of Dentistry, Chonnam National  
20 University, Gwangju 500-757, Republic of Korea.

21 E-mail address: thlee83@jnu.ac.kr  
22

23 **Supplementary materials and methods**

24  
25 *Tissue sample preparation*

26 Thirteen CRC patient samples were used for proteomic analysis. Detailed information about  
27 the samples are summarized in our previous report.<sup>1</sup>

28

29 *Nano-UPLC MS<sup>E</sup> shotgun proteomics*

30 Details of the procedures can be found in our earlier reports.<sup>1,2</sup>

31

32 *Fibroblast growth factor (FGF)-2 treatment*

33 MC38 cells expressing a WT or mutant Pg were serum-starved for 24 h and then maintained  
34 for 30 min, 3 h, or 24 h with FBS-reduced (1% FBS) media containing 0, 10, or 50 ng/ml  
35 recombinant human FGF-2 (Peprotech, Rocky Hill, NJ) and 1 µg/ml heparin to stimulate the  
36 cadherin/catenin axis. The proteins extracted from cells treated with different FGF-2  
37 concentrations and incubation time were loaded onto SDS-PAGE gels and immunoblotted  
38 with anti-HA (CST) and anti-GFP (Abfrontier) to detect protein expression of Pg and E-  
39 cadherin. This was followed by incubation with HRP-conjugated secondary antibody and  
40 detected using an ECL system (iNtRON, South Korea).

41

42 **Supplementary references**

43 1 Yang HY, Kwon J, Park HR, Kwon SO, Park YK, Kim HS, *et al.* Comparative proteomic  
44 analysis for the insoluble fractions of colorectal cancer patients. *J Proteomics*  
45 2012;75(12):3639-53.

46 2 Yang HY, Chay KO, Kwon J, Kwon SO, Park YK, Lee TH. Comparative proteomic  
47 analysis of cysteine oxidation in colorectal cancer patients. *Mol Cells* 2013;35(6):533-42.

48

49 **Table S1. Clinical information about the biopsies from CRC patients**

| Case No. | Age (years) | Gender | Colon site   | Tumor stage | Pathologic grade | TNM (metastasis) |
|----------|-------------|--------|--------------|-------------|------------------|------------------|
| 553      | 77          | Male   | Rectum       | II          | None             | T3N0M0           |
| 350      | 67          | Female | Upper rectum | II          | Well             | T3N0             |
| 1323     | 46          | Female | Rectum       | II          | Moderate         | T3N0M0           |
| 1367     | 76          | Male   | Sigmoid      | III         | Well             | T3N1             |
| 948      | 57          | Female | Rectum       | III         | Moderate         | T3N2             |
| 1500     | 64          | Male   | Rectum       | III         | Moderate         | T3N2M0           |

50

51

52 **Table S2. Information on Pg peptide sequences containing variably modified cysteines**  
 53 **in tumor and non-tumor tissues from CRC patients**

| IPI accession No | Peptide sequence <sup>a</sup>             | Cys. local <sup>b</sup> | Cys. modification | Unique <sup>c</sup> | pT:pN ratio <sup>d</sup> |
|------------------|-------------------------------------------|-------------------------|-------------------|---------------------|--------------------------|
| IPI00554711      | VREAM <u>C</u> PGVSGEGQLALLATQVEGQ        | 90                      | Carbamidomethyl   | pN                  |                          |
| IPI00554711      | VREAM <u>C</u> PGVSGEGQLALLATQVEGQ        | 90                      | Sulfinic          | pT                  |                          |
| IPI00554711      | VREAM <u>C</u> PGVSGEGQLALLATQVEGQ        | 90                      | Carbamidomethyl   |                     | 0.13                     |
| IPI00554711      | VREAM <u>C</u> PGVSGEGQLALLATQVEGQ        | 90                      | Carbamidomethyl   |                     | 1.57                     |
| IPI00789324      | <u>C</u> TTSILHNLSHHR                     | 204                     | Carbamidomethyl   | pN                  |                          |
| IPI00554711      | <u>C</u> TTSILHNLSHHR                     | 204                     | Carbamidomethyl   | pT                  |                          |
| IPI00554711      | <u>C</u> TTSILHNLSHHREGLLAIFK             | 204                     | Sulfinic          | pT                  |                          |
| IPI00789324      | <u>C</u> TTSILHNLSHHREGLLAIFK             | 204                     | Sulfinic          |                     | 1.39                     |
| IPI00554711      | FLAITTD <u>C</u> LQLLAYGNQESK             | 291                     | Carbamidomethyl   | pN                  |                          |
| IPI00554711      | FLAITTD <u>C</u> LQLLAYGNQESK             | 291                     | Sulfinic          | pN                  |                          |
| IPI00789324      | FLAITTD <u>C</u> LQLLAYGNQESK             | 291                     | Sulfinic          | pT                  |                          |
| IPI00554711      | FLAITTD <u>C</u> LQLLAYGNQESK             | 291                     | Sulfinic          |                     | 0.93                     |
| IPI00789324      | FLAITTD <u>C</u> LQLLAYGNQESK             | 291                     | Carbamidomethyl   |                     | 0.49                     |
| IPI00789324      | ILVNQLSVDDVNVLT <u>C</u> ATGTLNL <u>C</u> | 410, 420                | Sulfinic          | pT                  |                          |
| IPI00789324      | ILVNQLSVDDVNVLT <u>C</u> ATGTLNL <u>C</u> | 410, 420                | Sulfinic          |                     | 1.42                     |
| IPI00789324      | AGDKDDITEPAV <u>C</u> ALR                 | 457                     | Carbamidomethyl   | pN                  |                          |
| IPI00554711      | AGDKDDITEPAV <u>C</u> ALR                 | 457                     | Sulfinic          | pT                  |                          |
| IPI00554711      | AGDKDDITEPAV <u>C</u> ALR                 | 457                     | Carbamidomethyl   |                     | 0.56                     |
| IPI00554711      | NLAL <u>C</u> PANHAPLQEAAVIPR             | 511                     | Carbamidomethyl   | pN                  |                          |
| IPI00554711      | NLAL <u>C</u> PANHAPLQEAAVIPR             | 511                     | Carbamidomethyl   | pT                  |                          |
| IPI00554711      | NLAL <u>C</u> PANHAPLQEAAVIPR             | 511                     | Sulfinic          |                     | 1.13                     |
| IPI00554711      | VAAGVL <u>C</u> ELAQDK                    | 609                     | Carbamidomethyl   | pN                  |                          |
| IPI00789324      | VAAGVL <u>C</u> ELAQDK                    | 609                     | Sulfinic          | pN                  |                          |

54 <sup>a</sup>C is a cysteine exhibiting variable modification; carbamidomethylation (IAM binding) or oxidation (sulfinic or  
 55 sulfenic)

56 <sup>b</sup>Cys local indicates the cysteine position within the protein sequence.

57 <sup>c</sup>Unique indicates tissue-specific cysteine modification; pN (patient non-tumor) or pT (patient tumor) tissue

58 <sup>d</sup>pT:pN ratios were calculated for cysteine modifications without tissue-specificity

59

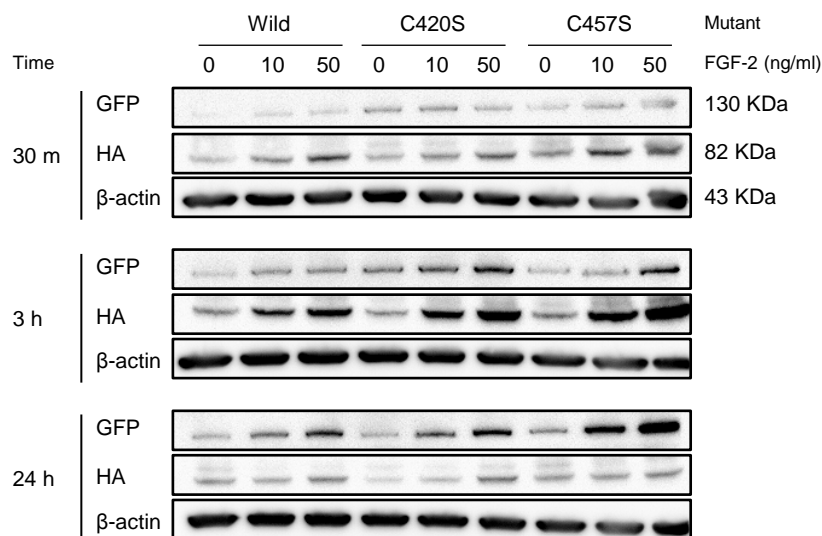

60  
61

62 **Supplementary Figure 1.** Protein expression level of Pg and E-cadherin after FGF-2  
63 treatment. MC38 cells co-transfected with E-cadherin plus WT or mutant Pg were incubated  
64 with different concentrations (0, 10, or 50 ng/ml) and incubation time (30 m, 3 h, or 24 h) of  
65 FGF-2, after which Pg (HA) and E-cadherin (GFP) expression was evaluated.
